# Supplementary material for: Site-selective occupancy of Cr3+ enabling tunable emission from near infrared I to II in fluoride LiInF4:Cr3+
Source: Royal Society of Chemistry journal article supplement (doi:10.1039/d3tc04251k), 2024-01-01
Supplement: d3tc04251k1.pdf [file d3tc04251k1.pdf]

# **Site-Selective Occupancy of Cr<sup>3+</sup> Enabling Tunable Emission from Near Infrared I to II in Fluoride LiInF<sub>4</sub>:Cr<sup>3+</sup>**

H. Chang<sup>a</sup>, F.Q. He<sup>a</sup>, E.H. Song<sup>a\*</sup> and Q.Y. Zhang<sup>a,b\*</sup>

<sup>a</sup>State Key Laboratory of Luminescent Materials and Devices and Institute of Optical  
Communication Materials, South China University of Technology, Guangzhou 510641, China

<sup>b</sup>School of Physics and Optoelectronics, South China University of Technology, Guangzhou  
510641, China

\*Correspondence: [msehsong@scut.edu.cn](mailto:msehsong@scut.edu.cn) (E. H. Song); [qyzhang@scut.edu.cn](mailto:qyzhang@scut.edu.cn) (Q. Y. Zhang)

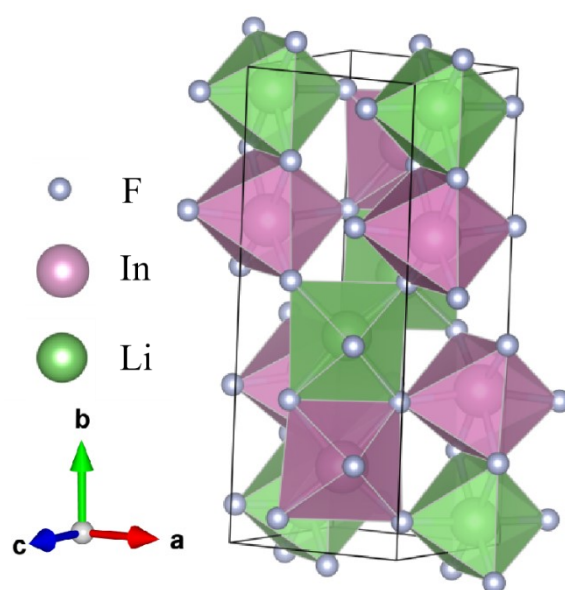

**Figure S1.** Crystal structure of  $\text{LiInF}_4(\text{LiF})$ .

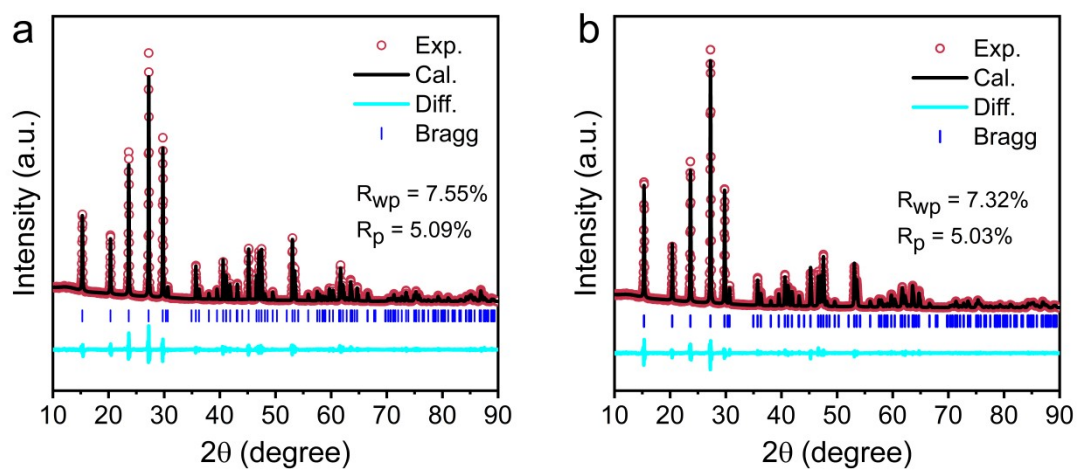

**Figure S2.** Powder X-ray diffraction (XRD) Rietveld refinements results of (a) LIF and (b) LIF:0.15Cr<sup>3+</sup> samples.

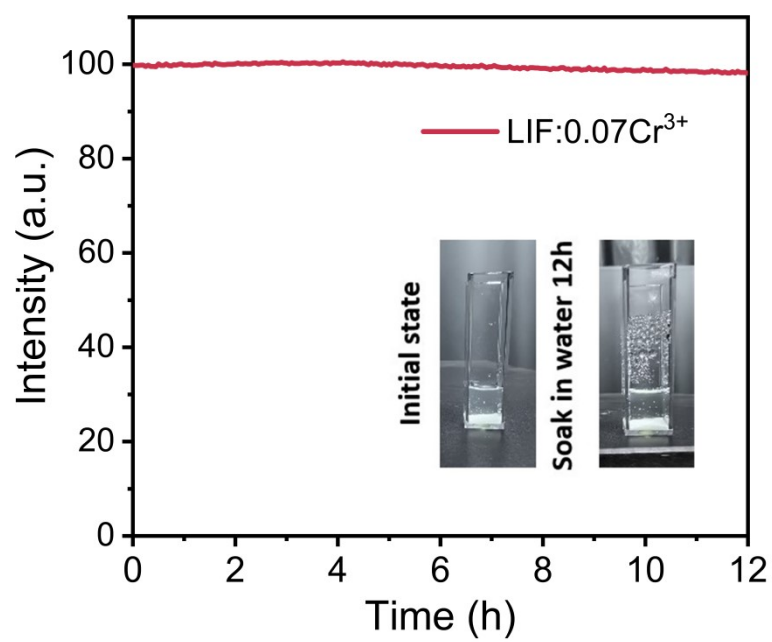

**Figure S3.** The emission intensity of LIF:0.07Cr<sup>3+</sup> versus time after being soaked in water.

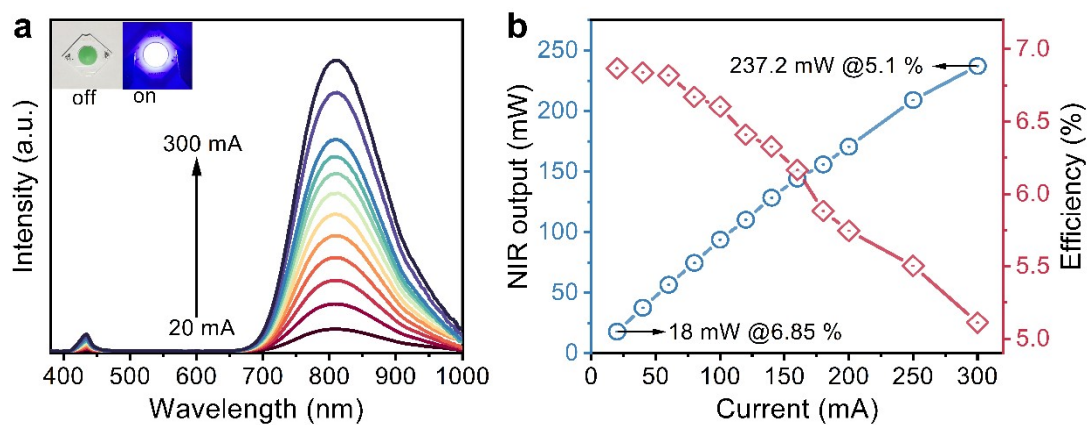

**Figure S4.** (a) Electroluminescence spectra of NIR I emission pc-LED (LED 2) driving by varied current, the insets show photographs of the LED 2 on and off. (b) The NIR output and photoelectric conversion efficiency of NIR I emission pc-LED (LED 2).

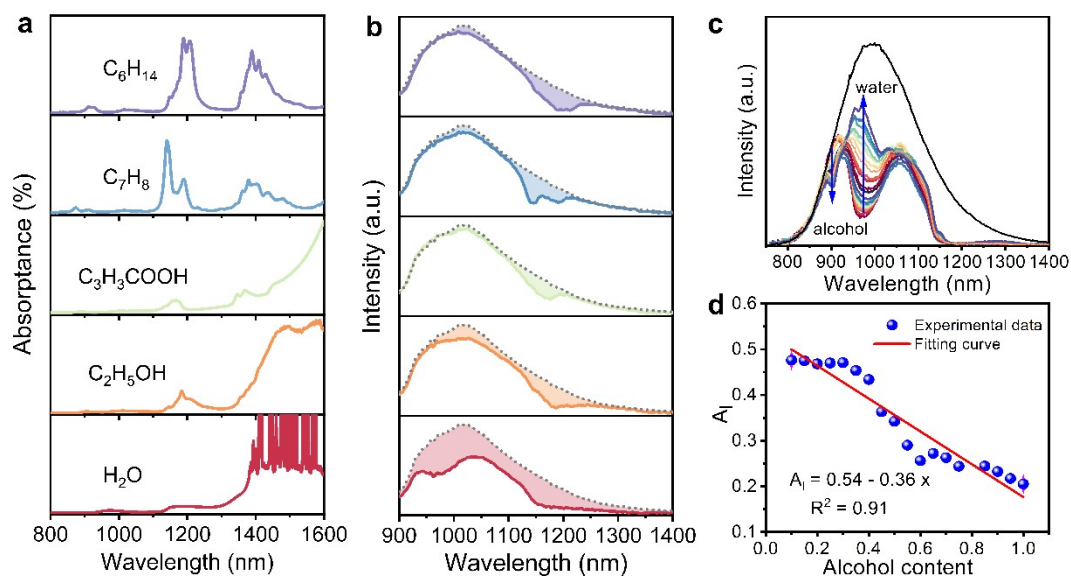

**Figure S5.** (a) absorption spectra of five organic solvents including  $H_2O$ ,  $C_2H_5OH$ ,  $CH_3OH$ ,  $C_7H_8$ , and  $C_6H_{14}$ . (b) emission spectra of fabricated NIR II emission pc-LED(LED1) from before (dotted line) and after (solid line) penetrating different organic solvents. (c) emission spectra of LED1 after penetrating the mix solution of  $H_2O$  and  $C_2H_5OH$  in different concentration ratio. (d) Functional relationship curve of alcohol concentration and NIR light absorbance.

**Table S1.** Rietveld refinement and crystallographic parameters of LIF and LIF:0.15Cr<sup>3+</sup>.

|                     | LIF       | LIF:0.15Cr <sup>3+</sup> |
|---------------------|-----------|--------------------------|
| Space group         | Pbcn (60) | Pbcn (60)                |
| a[Å]                | 4.75      | 4.75                     |
| b[Å]                | 11.73     | 11.73                    |
| c[Å]                | 4.98      | 4.97                     |
| V[Å <sup>3</sup> ]  | 277.39    | 276.72                   |
| R <sub>wp</sub> [%] | 7.55      | 7.32                     |
| R <sub>p</sub> [%]  | 5.09      | 5.03                     |
| $\chi^2$            | 3         | 2.36                     |
